# Supplementary material for: A mouse model of juvenile hemochromatosis
Source: JCI journal article supplement (doi:10.1172/jci25049), 2005-08-01
Supplement: sd1 [file 1]

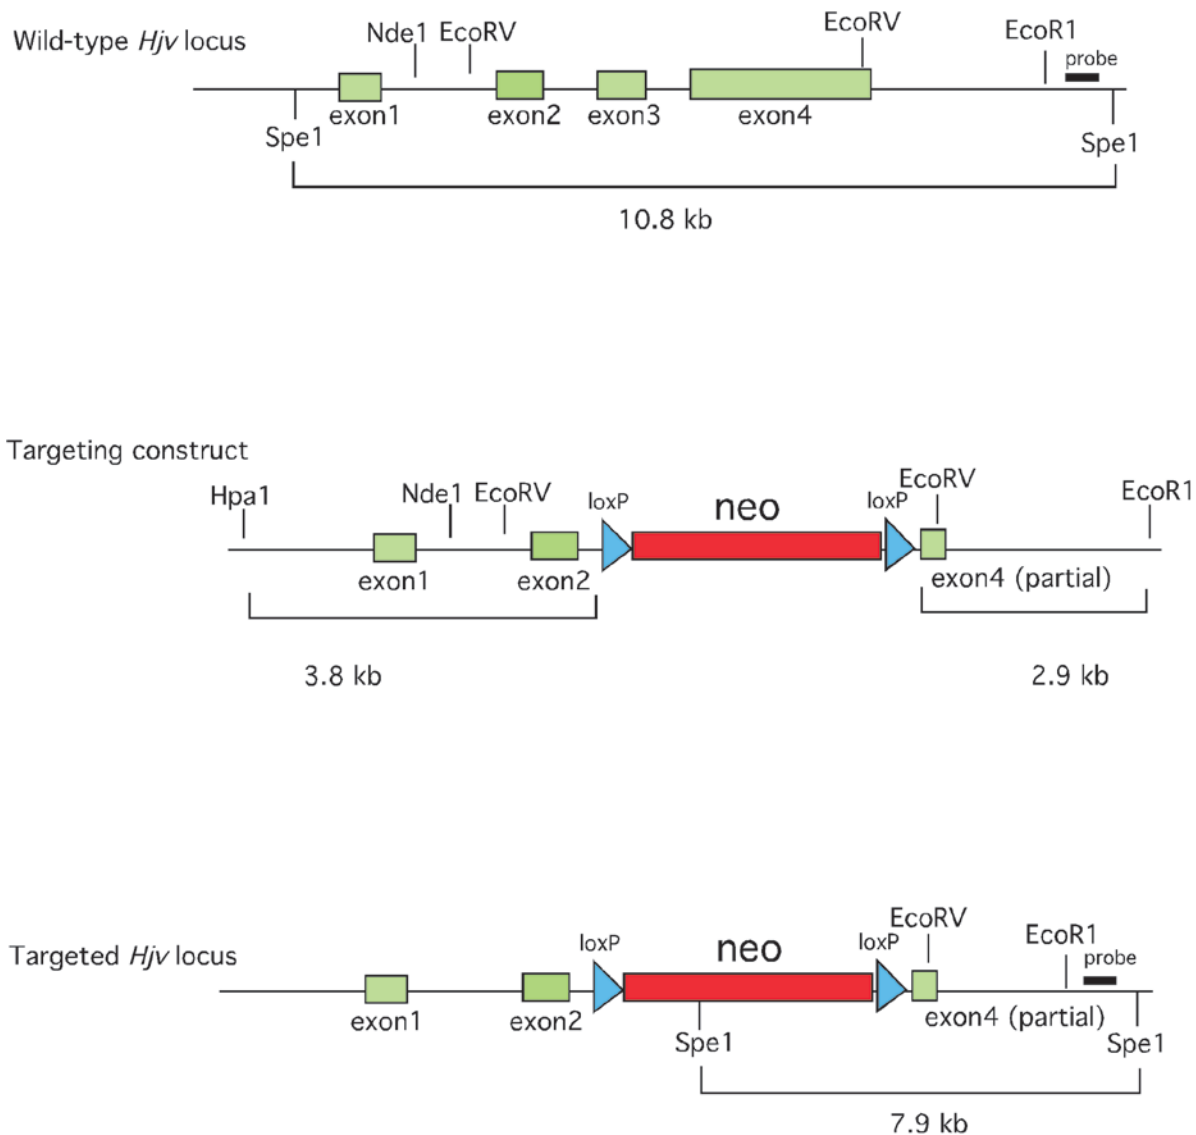

**Supplementary Figure 1.** *Hjv* targeting construct.

The structure of the *Hjv* genomic locus is shown at the top. The targeting construct is shown in the middle. The resulting, targeted locus is shown at the bottom. Exons are shown in green, loxP sites in blue and the neomycin resistance cassette in red. Key restriction endonuclease sites and probe locations are indicated.
